# Supplementary material for: An integrated metabolomics and 16S rRNA gene sequencing approach exploring the molecular pathways and potential targets behind the effects of Radix Scrophulariae
Source: Royal Society of Chemistry journal article supplement (doi:10.1039/c9ra03912k), 2019-01-01
Supplement: c9ra03912k1.pdf [file c9ra03912k1.pdf]

1  
2  
3

Table S1 Potential faecal biomarkers in *Radix Scrophulariae*-treated rats.

| No. | Rt_m/z         | Compound ID | VIP     | ion mode | Formula    | Description            | Pathways                                                                      |
|-----|----------------|-------------|---------|----------|------------|------------------------|-------------------------------------------------------------------------------|
| 1   | 1.39_136.0399  | HMDB00157   | 1.3164  | pos      | C5H4N4O    | Hypoxanthine           | Purine metabolism                                                             |
| 2   | 0.99_153.0411  | HMDB00292   | 1.7322  | pos      | C5H4N4O2   | Xanthine               | Purine metabolism, Caffeine metabolism                                        |
| 3   | 13.41_280.2406 | HMDB00673   | 2.3958  | neg      | C18H32O2   | Linoleic acid          | Linoleic acid metabolism                                                      |
| 4   | 3.97_164.0477  | HMDB02035   | 1.1405  | neg      | C9H8O3     | 4-Hydroxycinnamic acid | Ubiquinone and other terpenoid-quinone biosynthesis, Phenylalanine metabolism |
| 5   | 1.44_268.0804  | HMDB00195   | 1.6379  | neg      | C10H12N4O5 | Inosine                | Purine metabolism                                                             |
| 6   | 6.68_408.2877  | HMDB00619   | 14.5787 | neg      | C24H40O5   | Cholic acid            | Primary bile acid biosynthesis                                                |
| 7   | 0.66_221.0900  | HMDB00215   | 2.3694  | neg      | C8H15NO6   | N-Acetyl-D-glucosamine | Amino sugar and nucleotide sugar metabolism                                   |
| 8   | 7.84_595.3498  | HMDB04157   | 1.4764  | neg      | C33H48N4O6 | L-Urobilinogen         | Porphyrin and chlorophyll metabolism                                          |
| 9   | 1.64_304.0773  | HMDB00133   | 1.3461  | neg      | C10H13N5O5 | Guanosine              | Purine metabolism                                                             |
| 10  | 1.08_289.0675  | HMDB00296   | 2.8402  | neg      | C9H12N2O6  | Uridine                | Pyrimidine metabolism                                                         |

4  
5  
6  
7  
8  
9

1  
2  
3  
4  
5  
6  
7  
8  
9  
10  
11  
12  
13  
14

Table S2. Fingerprint pathway in normal rats treated with *Radix Scrophulariae* determined using MetPA analysis.

| Pathway name                                        | Total | Expected | Hits | Raw p     | -log(p) | Holm adjust | FDR     | Impact  |
|-----------------------------------------------------|-------|----------|------|-----------|---------|-------------|---------|---------|
| Purine metabolism                                   | 92    | 0.72622  | 4    | 0.0049847 | 5.3014  | 0.39878     | 0.39878 | 0.05662 |
| Linoleic acid metabolism                            | 15    | 0.1184   | 1    | 0.11239   | 2.1858  | 1           | 1       | 0.65625 |
| Caffeine metabolism                                 | 21    | 0.16577  | 1    | 0.1539    | 1.8714  | 1           | 1       | 0.0305  |
| Ubiquinone and other terpenoid-quinone biosynthesis | 36    | 0.28417  | 1    | 0.24979   | 1.3871  | 1           | 1       | 0.0337  |
| Phenylalanine metabolism                            | 45    | 0.35521  | 1    | 0.30228   | 1.1964  | 1           | 1       | 0.01193 |
| Primary bile acid biosynthesis                      | 47    | 0.371    | 1    | 0.31346   | 1.1601  | 1           | 1       | 0.00027 |
| Pyrimidine metabolism                               | 60    | 0.47362  | 1    | 0.38211   | 0.96204 | 1           | 1       | 0.02061 |
| Amino sugar and nucleotide sugar metabolism         | 88    | 0.69464  | 1    | 0.50854   | 0.67622 | 1           | 1       | 0.01122 |
| Porphyrin and chlorophyll metabolism                | 104   | 0.82094  | 1    | 0.56934   | 0.56328 | 1           | 1       | 0.00167 |

Note: Total is the total number of compounds in the pathway; Hits is the exact number of matches in the uploaded tag data; Raw p is the original P value obtained by path analysis; Impact is the path influence value obtained by topological analysis.

1  
2  
3  
4

Table S3. Taxonomic comparisons between the control group and *Radix Scrophulariae* group at the genus level

| OTU             | Mean abundance- Radix Scrophulariae (%) | Mean abundance-control (%) | p-value  | q-value  |
|-----------------|-----------------------------------------|----------------------------|----------|----------|
| Corynebacterium | 0.0042                                  | 0.1447                     | 0.000056 | 0.005009 |
| Dehalobacterium | 0.0172                                  | 0.0806                     | 0.000289 | 0.013023 |
| Brevundimonas   | 0                                       | 0.0284                     | 0.000678 | 0.02037  |
| Rhodococcus     | 0                                       | 0.0451                     | 0.001589 | 0.035814 |
| Ruminococcus    | 1.3414                                  | 8.5845                     | 0.002022 | 0.036465 |
| Prevotella      | 0.2085                                  | 12.1782                    | 0.003189 | 0.047919 |
| Butyricimonas   | 0.0792                                  | 0.0142                     | 0.0055   | 0.070841 |
| Enhydrobacter   | 0.0032                                  | 0.0312                     | 0.0086   | 0.096923 |
| Rothia          | 0.0118                                  | 0                          | 0.009844 | 0.097811 |
| Facklamia       | 0.1055                                  | 0.0293                     | 0.010944 | 0.097811 |
| Lactobacillus   | 26.1461                                 | 13.7453                    | 0.211067 | 0.528106 |
| Neisseria       | 0                                       | 0.0056                     | 0.011933 | 0.097811 |
| Lactococcus     | 0.0287                                  | 0.0035                     | 0.014078 | 0.105772 |

---

|                    |        |        |          |          |
|--------------------|--------|--------|----------|----------|
| Flavobacterium     | 0      | 0.0126 | 0.016967 | 0.117672 |
| Geobacillus        | 0.0455 | 0.0024 | 0.022067 | 0.134774 |
| Burkholderia       | 0.0634 | 0.0018 | 0.022422 | 0.134774 |
| Acinetobacter      | 0.009  | 0.0618 | 0.025    | 0.140781 |
| Odoribacter        | 0.1373 | 0.0053 | 0.026544 | 0.140781 |
| Anaerobiospirillum | 0.0046 | 0.0428 | 0.034833 | 0.174478 |
| Zea                | 0.0054 | 0      | 0.042644 | 0.202362 |
| Sediminibacterium  | 0.2641 | 0.0503 | 0.049778 | 0.224401 |

---

1

2
